# Supplementary material for: Objectively Assessed Weight Change and All-Cause Mortality among Community-Dwelling Older People
Source: MDPI journal article supplement (doi:10.3390/nu14142983), 2022-07-21
Supplement: s1 [file s1]

## Article

# Objectively Assessed Weight Change and All-Cause Mortality among Community-Dwelling Older People

Tagrid Alharbi <sup>1</sup>, Joanne Ryan <sup>1</sup>, Rosanne Freak-Poli <sup>1,2</sup>, Danijela Gasevic <sup>1,3</sup>, Jacqueline Scali <sup>4</sup>, Karen Ritchie <sup>4,5</sup>, Marie-Laure Ancelin <sup>4</sup> and Alice J. Owen <sup>1,\*</sup>

<sup>1</sup> School of Public Health and Preventive Medicine, Monash University, 553 St. Kilda Rd, Melbourne, VIC 3004, Australia; tagrid.alharbi@monash.edu (T.A.); joanne.ryan@monash.edu (J.R.); rosanne.freak-poli@monash.edu (R.F.-P.); danijela.gasevic@monash.edu (D.G.)

<sup>2</sup> Department of Epidemiology, Erasmus Medical Centre, 3015 GD Rotterdam, The Netherlands

<sup>3</sup> Usher Institute, University of Edinburgh, Teviot Place, Edinburgh EH8 9AG, UK

<sup>4</sup> INM, Université de Montpellier, INSERM, 34000 Montpellier, France; jacqueline.scali@inserm.fr (J.S.); karen.ritchie@inserm.fr (K.R.); marie-laure.ancelin@inserm.fr (M.-L.A.)

<sup>5</sup> Centre for Clinical Brain Sciences, University of Edinburgh, Edinburgh EH16 4SB, UK

\* Correspondence: alice.owen@monash.edu; Tel.: +61-3-9903-0416

**Citation:** Alharbi, T.; Ryan, J.; Freak-Poli, R.; Gasevic, D.; Scali, J.; Ritchie, K.; Ancelin, M.-L.; Owen, A.J. Objectively Assessed Weight Change and All-Cause Mortality among Community-Dwelling Older People. *Nutrients* **2022**, *14*, 2983. <https://doi.org/10.3390/nu14142983>

Academic Editor: Hirofumi Tanaka

Received: 23 June 2022

Accepted: 18 July 2022

Published: 21 July 2022

**Publisher's Note:** MDPI stays neutral with regard to jurisdictional claims in published maps and institutional affiliations.

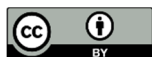

**Copyright:** © 2022 by the authors. Licensee MDPI, Basel, Switzerland. This article is an open access article distributed under the terms and conditions of the Creative Commons Attribution (CC BY) license (<https://creativecommons.org/licenses/by/4.0/>).

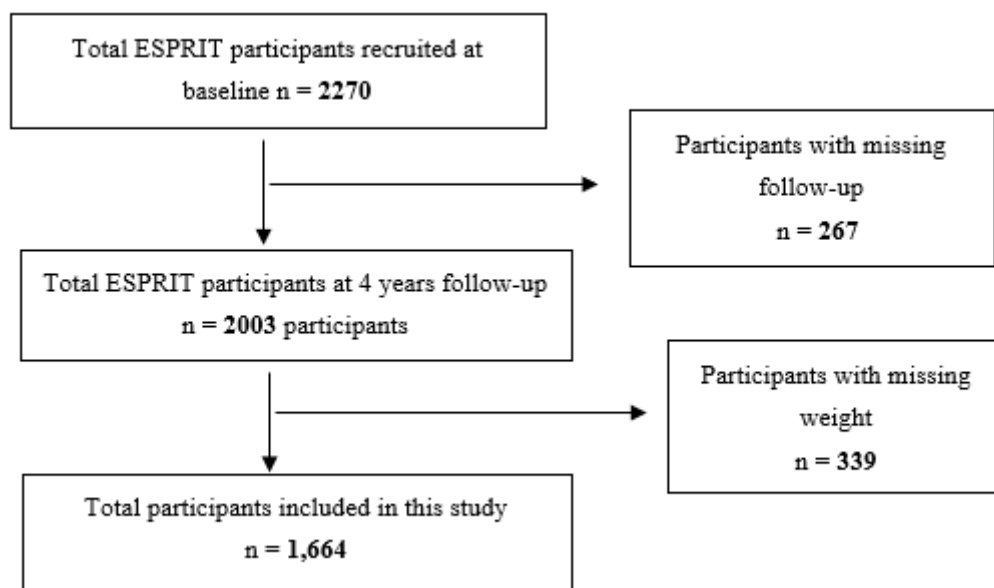

**Figure S1.** Flow diagram of study participants included in this analysis.

**Table S1.** Characteristics of ESPRIT participants who were missing at follow-up and had missing weight variable compared with not missing.

|                                                       | Missing            | Not Missing        | <i>p</i> -Value |
|-------------------------------------------------------|--------------------|--------------------|-----------------|
| <b>Total <i>n</i> (%)</b>                             | 606 (26.7%)        | 1664 (73.3%)       |                 |
| Age, years mean ( $\pm$ SD)                           | 74.9 ( $\pm$ 6.2)  | 72.7 ( $\pm$ 5.3)  | <0.001          |
| Sex <i>n</i> (%)                                      |                    |                    |                 |
| Women                                                 | 328 (55.1%)        | 985 (59.2%)        | 0.08            |
| Men                                                   | 267 (44.8%)        | 679 (40.8%)        |                 |
| Weight, kg mean ( $\pm$ SD)                           | 67.3 ( $\pm$ 12.0) | 67.3 ( $\pm$ 12.8) | 0.12            |
| BMI <sup>1</sup> , kg/m <sup>2</sup> mean ( $\pm$ SD) | 25.2 ( $\pm$ 4.0)  | 25.0 ( $\pm$ 3.5)  | 0.07            |
| Marital status <i>n</i> (%)                           |                    |                    |                 |
| Married                                               | 167 (61.6%)        | 810 (67.8%)        | 0.15            |
| divorced/separated, widow, single                     | 104 (38.4%)        | 358 (32.2%)        |                 |
| Smoking status <i>n</i> (%)                           |                    |                    |                 |
| Non- smoker                                           | 257 (43.3%)        | 691 (41.5%)        | 0.46            |
| past/current smoker                                   | 337 (56.7%)        | 973 (58.5%)        |                 |
| Alcohol consumption <i>n</i> (%)                      |                    |                    |                 |
| Non/past alcohol drinker                              | 130 (21.9%)        | 252 (15.2%)        | <0.001          |
| Alcohol drinker                                       | 464 (78.1%)        | 1407 (84.8%)       |                 |
| Education <i>n</i> (%)                                |                    |                    |                 |
| Not Completed at least secondary school               | 434 (73.2%)        | 1078 (64.7%)       | <0.001          |
| Completed at least secondary school                   | 159 (26.8%)        | 568 (35.2%)        |                 |
| Diabetes <i>n</i> (%)                                 |                    |                    |                 |
| No                                                    | 503 (87.8%)        | 1501 (91.1%)       | 0.02            |
| Yes                                                   | 70 (12.2%)         | 148 (9.0%)         |                 |
| Recent cancer <i>n</i> (%)                            |                    |                    |                 |
| No                                                    | 586 (96.7%)        | 1622 (97.5%)       | 0.31            |
| Yes                                                   | 20 (3.3%)          | 42 (2.5%)          |                 |
| Current depression <sup>2</sup> <i>n</i> (%)          |                    |                    |                 |
| No                                                    | 357 (61.1%)        | 1186 (74.8%)       | <0.001          |

Yes

227 (38.8%)

464 (28.1%)

<sup>1</sup> BMI: body mass index; (BMI categories): underweight (<18.5), normal (18.5–25), overweight (25–30) and obese (≥30). Diabetes = self-report of diabetes or fasting glycaemia 7.0 mmol/L or reported treatment. <sup>2</sup> Current depression = high depressive symptoms (CESD) or current major depressive disorder (MDD).

**Table S2.** The association between ±5 kg weight change and all-cause mortality ( $n = 1664$ ).

|               | <i>n/n</i> Events (%) | Model 1          |                 | Model 2          |                 | Model 3          |                 |
|---------------|-----------------------|------------------|-----------------|------------------|-----------------|------------------|-----------------|
| Weight change |                       | HR (95% CI)      | <i>p</i> -Value | HR (95% CI)      | <i>p</i> -Value | HR (95% CI)      | <i>p</i> -Value |
| Weight loss   | 176/94 (16.6)         | 1.77 (1.41–2.21) | <0.001          | 1.78 (1.42–2.24) | <0.001          | 1.70 (1.35–2.18) | <0.001          |
| Weight stable | 1370/435 (76.9)       | 1.00             |                 | 1.00             |                 | 1.00             |                 |
| Weight gain   | 118/36 (6.4)          | 1.10 (0.78–1.55) | 0.56            | 1.07 (0.76–1.52) | 0.69            | 1.10 (0.74–1.64) | 0.62            |

$n$  = number of observations; HR = hazard ratio; CI = confidence interval. Weight change: weight loss (≥5 kg), weight stable (±<5 kg) and weight gain (≥5 kg). Model 1: adjusted for sex (age as time scale in the model). Model 2: adjusted for sex (age as time scale in the model) marital status, education level, smoking status and alcohol consumption. Model 3: adjusted for sex (age as time scale in the model) marital status, education level, smoking status and alcohol consumption depression, diabetes, baseline BMI and waist circumference.

**Table S3.** The association between ±5 kg weight change and CVD mortality ( $n = 1664$ ).

|               | <i>n/n</i> Events (%) | Model 1          |                 | Model 2          |                 | Model 3          |                 |
|---------------|-----------------------|------------------|-----------------|------------------|-----------------|------------------|-----------------|
| Weight change |                       | HR (95% CI)      | <i>p</i> -Value | HR (95% CI)      | <i>p</i> -Value | HR (95% CI)      | <i>p</i> -Value |
| Weight loss   | 176/45 (18.7)         | 2.06 (1.48–2.86) | <0.001          | 2.03 (1.44–2.85) | <0.001          | 2.04 (1.42–2.95) | <0.001          |
| Weight stable | 1370/180 (74.7)       | 1.00             |                 | 1.00             |                 | 1.00             |                 |
| Weight gain   | 118/16 (6.6)          | 1.19 (0.71–1.99) | 0.69            | 1.07 (0.71–1.98) | 0.51            | 1.15 (0.61–2.12) | 0.66            |

$n$  = number of observations; HR = hazard ratio; CI = confidence interval. Weight change: weight loss (≥5 kg), weight stable (±<5%) and weight gain (≥5 kg). Model 1: adjusted for sex (age as time scale in the model). Model 2: adjusted for sex (age as time scale in the model) marital status, education level, smoking status and alcohol consumption. Model 3: adjusted for sex (age as time scale in the model) marital status, education level, smoking status and alcohol consumption depression, diabetes, baseline BMI and waist circumference.

**Table S4.** The association between ±5 kg weight change and cancer mortality ( $n = 1664$ ).

|               | <i>n/n</i> Events (%) | Model 1          |                 | Model 2          |                 | Model 3          |                 |
|---------------|-----------------------|------------------|-----------------|------------------|-----------------|------------------|-----------------|
| Weight change |                       | HR (95% CI)      | <i>p</i> -Value | HR (95% CI)      | <i>p</i> -Value | HR (95% CI)      | <i>p</i> -Value |
| Weight loss   | 176/16 (11.2)         | 1.11 (0.66–1.88) | 0.68            | 1.13 (0.67–1.91) | 0.4             | 1.07 (0.61–1.86) | 0.80            |
| Weight stable | 1370/116 (81.1)       | 1.00             |                 | 1.00             |                 | 1.00             |                 |
| Weight gain   | 118/11 (7.7)          | 1.17 (0.63–2.18) | 0.60            | 1.17 (0.62–2.17) | 0.62            | 1.19 (0.60–2.38) | 0.60            |

$n$  = number of observations; HR = hazard ratio; CI = confidence interval. Weight change: weight loss (≥5 kg), weight stable (±<5 kg) and weight gain (≥5 kg). Model 1: adjusted for sex (age as time scale in the model). Model 2: adjusted for sex (age as time scale in the model) marital status, education level, smoking status and alcohol consumption. Model 3: adjusted for sex (age as time scale in the model) marital status, education level, smoking status and alcohol consumption depression, diabetes, baseline BMI and waist circumference.

**Table S5.** The association between weight change and all-cause mortality in ESPRIT participants ( $n = 1622$ , Events = 546), after excluding participants with recent cancer at baseline.

|               |                  | Model 1          |                 | Model 2          |                 | Model 3          |                 |
|---------------|------------------|------------------|-----------------|------------------|-----------------|------------------|-----------------|
| Weight change | <i>n</i> /Events | HR (95% CI)      | <i>p</i> -Value | HR (95% CI)      | <i>p</i> -Value | HR (95% CI)      | <i>p</i> -Value |
| Weight loss   | 265/128          | 1.31 (1.03–1.61) | 0.008           | 1.33 (1.08–1.63) | 0.007           | 1.30 (1.04–1.63) | 0.02            |
| Weight stable | 1164/362         | 1.00             |                 | 1.00             |                 | 1.00             |                 |
| Weight gain   | 193/56           | 1.04 (0.79–1.37) | 0.77            | 1.02 (0.77–1.36) | 0.87            | 1.03 (0.74–1.43) | 0.85            |

$n$  = number of observations; HR = hazard ratio; CI = confidence interval. Weight change: weight loss ( $\geq 5\%$ ), weight stable ( $\pm 5\%$ ) and weight gain ( $\geq 5\%$ ). Model 1: adjusted for sex (age as time scale in the model). Model 2: adjusted for sex (age as time scale in the model) marital status, education level, smoking status and alcohol consumption. Model 3: adjusted for sex (age as time scale in the model) marital status, education level, smoking status and alcohol consumption depression, diabetes, baseline BMI and waist circumference.

**Table S6.** The association between weight change and all-cause mortality in ESPRIT participants after excluding participants with more than 20% weight change.

| Weight change | $n$ /Events | Model 1          |            | Model 2          |            | Model 3          |            |
|---------------|-------------|------------------|------------|------------------|------------|------------------|------------|
|               |             | HR (95% CI)      | $p$ -Value | HR (95% CI)      | $p$ -Value | HR (95% CI)      | $p$ -Value |
| Weight loss   | 260/123     | 1.23 (1.00–1.51) | 0.04       | 1.24 (1.00–1.53) | 0.04       | 1.20 (0.96–1.52) | 0.11       |
| Weight stable | 1196/378    | 1.00             |            | 1.00             |            | 1.00             |            |
| Weight gain   | 191/57      | 1.06 (0.81–1.40) | 0.66       | 1.05 (0.79–1.39) | 0.74       | 1.07 (0.78–1.50) | 0.65       |

$n$  = number of observations; HR = hazard ratio; CI = confidence interval. Weight change: weight loss ( $\geq 5\%$ ), weight stable ( $\pm 5\%$ ) and weight gain ( $\geq 5\%$ ). Model 1: adjusted for sex (age as time scale in the model). Model 2: adjusted for sex (age as time scale in the model) marital status, education level, smoking status and alcohol consumption. Model 3: adjusted for sex (age as time scale in the model) marital status, education level, smoking status and alcohol consumption depression, diabetes, baseline BMI and waist circumference.

**Table S7.** Hazard ratio (HR) from competing risks survival analysis for causes of deaths other than CVD deaths ( $n = 1664$ ).

| Weight Change | HR (95% CI)      | $p$ -Value |
|---------------|------------------|------------|
| Weight loss   | 1.58 (1.17–2.12) | 0.003      |
| Weight stable | 1.00             |            |
| Weight gain   | 0.91 (0.57–1.45) | 0.69       |

**Table S8.** Hazard ratio (HR) from competing risks survival analysis for causes of deaths other than cancer deaths ( $n = 1664$ ).

| Weight Change | HR (95% CI)      | $p$ -Value |
|---------------|------------------|------------|
| Weight loss   | 0.79 (0.50–1.25) | 0.32       |
| Weight stable | 1.00             |            |
| Weight gain   | 1.08 (0.65–1.79) | 0.75       |

**Table S9.** The association between weight change and all-cause mortality in ESPRIT participants using the time in the study as time scale.

| Weight Change | Model 1          |            | Model 2          |            | Model 3          |            |
|---------------|------------------|------------|------------------|------------|------------------|------------|
|               | HR (95% CI)      | $p$ -Value | HR (95% CI)      | $p$ -Value | HR (95% CI)      | $p$ -Value |
| Weight loss   | 1.35 (1.10–1.65) | 0.004      | 1.36 (1.11–1.68) | 0.003      | 1.28 (1.02–1.60) | 0.03       |
| Weight stable | 1.00             |            | 1.00             |            | 1.00             |            |
| Weight gain   | 0.95 (0.72–1.25) | 0.71       | 0.91 (0.69–1.21) | 0.54       | 0.92 (0.66–1.27) | 0.62       |

Weight change: weight loss ( $\geq 5\%$ ), weight stable ( $\pm 5\%$ ), and weight gain ( $\geq 5\%$ ). Model 1: adjusted for sex and age. Model 2: adjusted for sex, age, marital status, education level, smoking status and alcohol consumption. Model 3: adjusted for sex, age marital status, education level, smoking status, alcohol consumption, depression, diabetes, recent cancer, baseline BMI and waist circumference.

**Table S10.** The association between weight change and all-cause mortality in ESPRIT participants using the age at 4 years follow-up, instead of age at baseline, to generate time scale.

| Weight Change | Model 1     |            | Model 2     |            | Model 3     |            |
|---------------|-------------|------------|-------------|------------|-------------|------------|
|               | HR (95% CI) | $p$ -Value | HR (95% CI) | $p$ -Value | HR (95% CI) | $p$ -Value |

|               |                  |      |                  |      |                  |      |
|---------------|------------------|------|------------------|------|------------------|------|
| Weight loss   | 1.22 (1.00–1.48) | 0.05 | 1.23 (1.00–1.51) | 0.05 | 1.20 (0.96–1.50) | 0.10 |
| Weight stable | 1.00             |      | 1.00             |      | 1.00             |      |
| Weight gain   | 1.04 (0.78–1.37) | 0.80 | 1.03 (0.77–1.35) | 0.85 | 1.07 (0.78–1.48) | 0.64 |

Weight change: weight loss ( $\geq 5\%$ ), weight stable ( $\pm 5\%$ ) and weight gain ( $\geq 5\%$ ). Model 1: adjusted for sex (age at 4 years follow-up used to generate time scale in the model). Model 2: adjusted for sex (age at 4 years follow-up used to generate time scale in the model) marital status, education level, smoking status and alcohol consumption. Model 3: adjusted for sex (age at 4 years follow-up used to generate time scale in the model) marital status, education level, smoking status, alcohol consumption, depression, diabetes, recent cancer, baseline BMI and waist circumference.
